# Supplementary material
Source: PubMed Central journal article supplement (PMC1140619)
Supplement: molcellb_25_11_4662__1.pdf [file molcellb_25_11_4662__1.pdf]

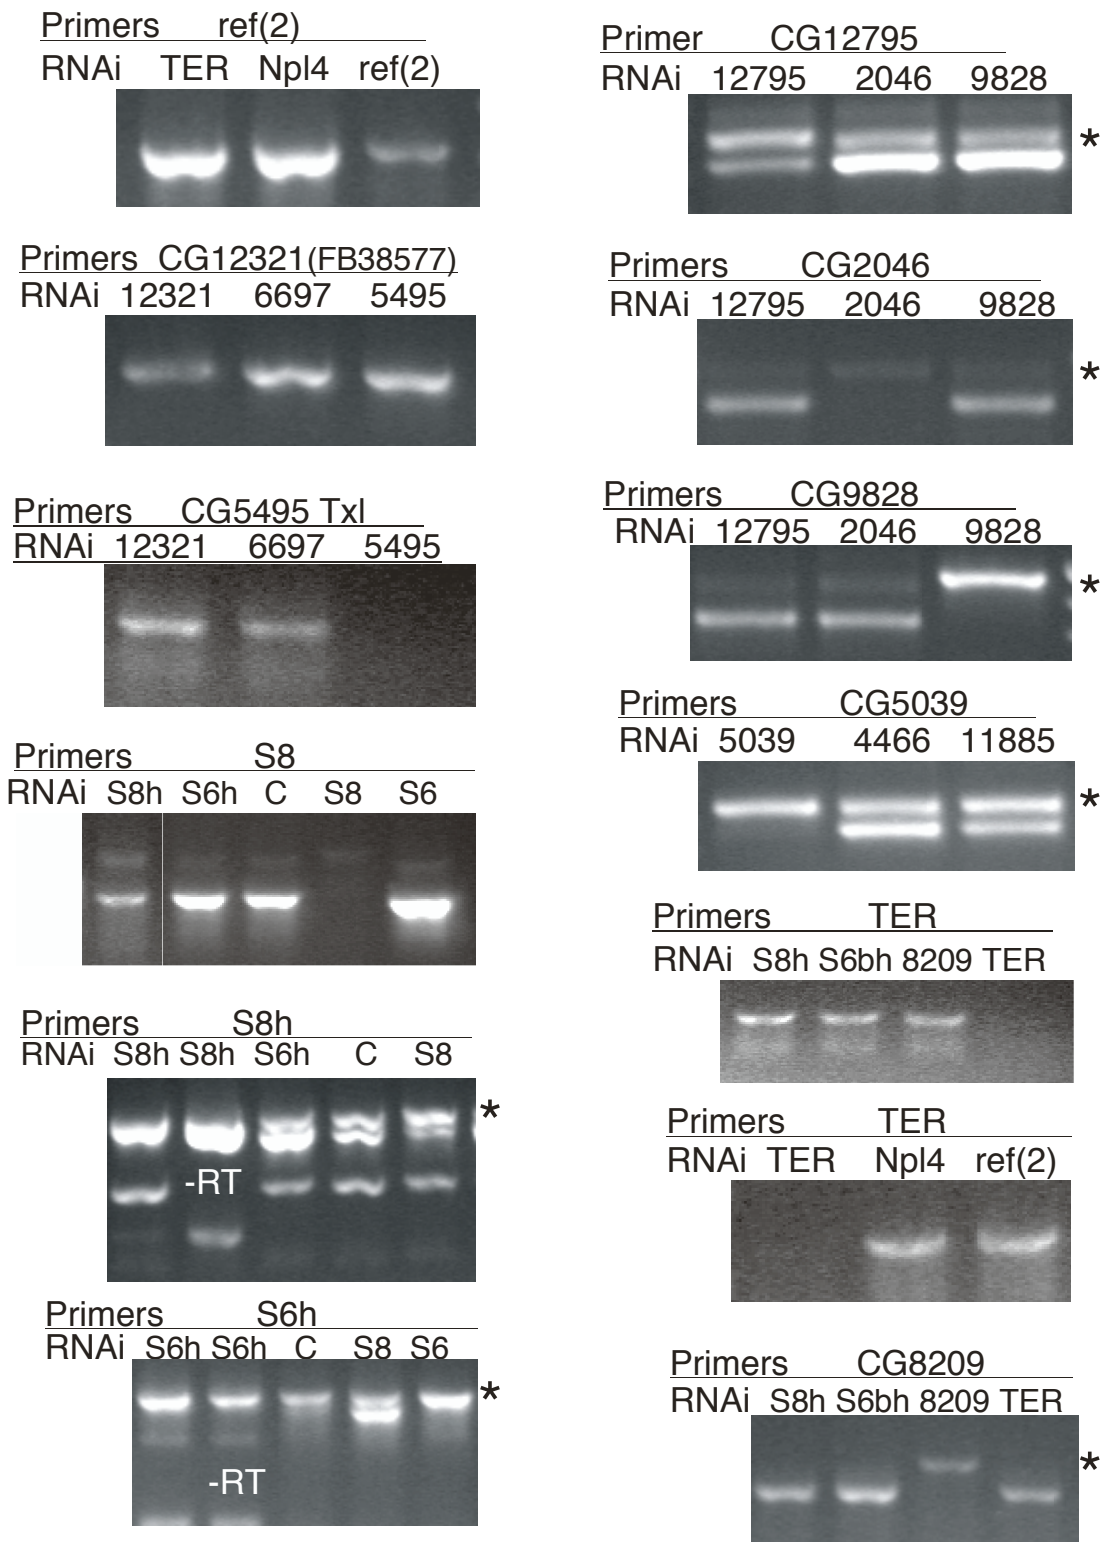

**Supplementary Figure S1.** Semi-quantitative RT-PCR to analyze mRNA levels after RNAi-mediated knock-down of candidate genes. Three to four days after addition of dsRNA the cells were collected and total RNA isolated. Specific primers for each gene were used to amplify the mRNA with the Promega Access RT-PCR system. -RT indicate that no reverse transcriptase was added to that reaction. \* Indicates amplification from genomic DNA. To confirm that RNAi treatment was specific for reducing the target mRNA, RT-PCR reactions were carried out on the specific RNAi knockdown, RNAi knockdowns of other candidate genes and on untreated cells, C.

Table III. Downregulated mRNAs\*

| CG Number | Name (function)                                                                                            | <u>RNAi Depletion of S5a subunit</u> | <u>MG132</u>    |
|-----------|------------------------------------------------------------------------------------------------------------|--------------------------------------|-----------------|
|           |                                                                                                            | <u>Treatment</u>                     |                 |
|           |                                                                                                            | Fold decrease                        | Fold decrease   |
| CG17970   | cytochrome P450, Cyp4ac2                                                                                   | -1.81                                | increased+1.91  |
| CG7619    | S5a proteasome subunit (pros54)                                                                            | -1.80                                | increased+3.75  |
| CG9505    | neutral endopeptidase, neprilysin<br>Similar to common acute lymphocytic<br>leukemia antigen, human X07166 | -1.51                                | -1.64           |
| CG6815    | belphegor "far-relative" AAA ATPases                                                                       | -1.48                                | -1.50           |
| CG10687   | asparaginyl tRNA synthetase                                                                                | -1.37                                | -0.59           |
| CG5535    | cationic amino-acid transporter                                                                            | -1.34                                | -2.45           |
| CG10833   | cytochrome P450, Cyp28d1                                                                                   | -1.32                                | no change       |
| CG18466   | (Nmdmc) methylenetetrahydrofolate<br>dehydrogenase and cyclohydrolase                                      | -1.23                                | -1.51           |
| CG15304   | similar to small Usmg5 protein, mouse                                                                      | -1.23                                | -2.15           |
| CG9470    | MtnA, Cu/Cd binding                                                                                        | -1.14                                | -3.21           |
| CG3074    | cathepsin B-like, endopeptidase                                                                            | -1.12                                | increased+20.68 |
| CG8846    | Thor initiation-factor-4E binding protein                                                                  | -0.91                                | -7.87           |

\* Only genes that decreased in 7 or more of the 9 comparisons for the S5a analysis shown.
